# Supplementary figures and images for: Predicting the Immune Microenvironment and Prognosis with a NETosis‐Related lncRNA Signature in Head and Neck Squamous Cell Carcinoma
Source: Hindawi journal article supplement (doi:10.1155/2022/3191474), 2022-01-01

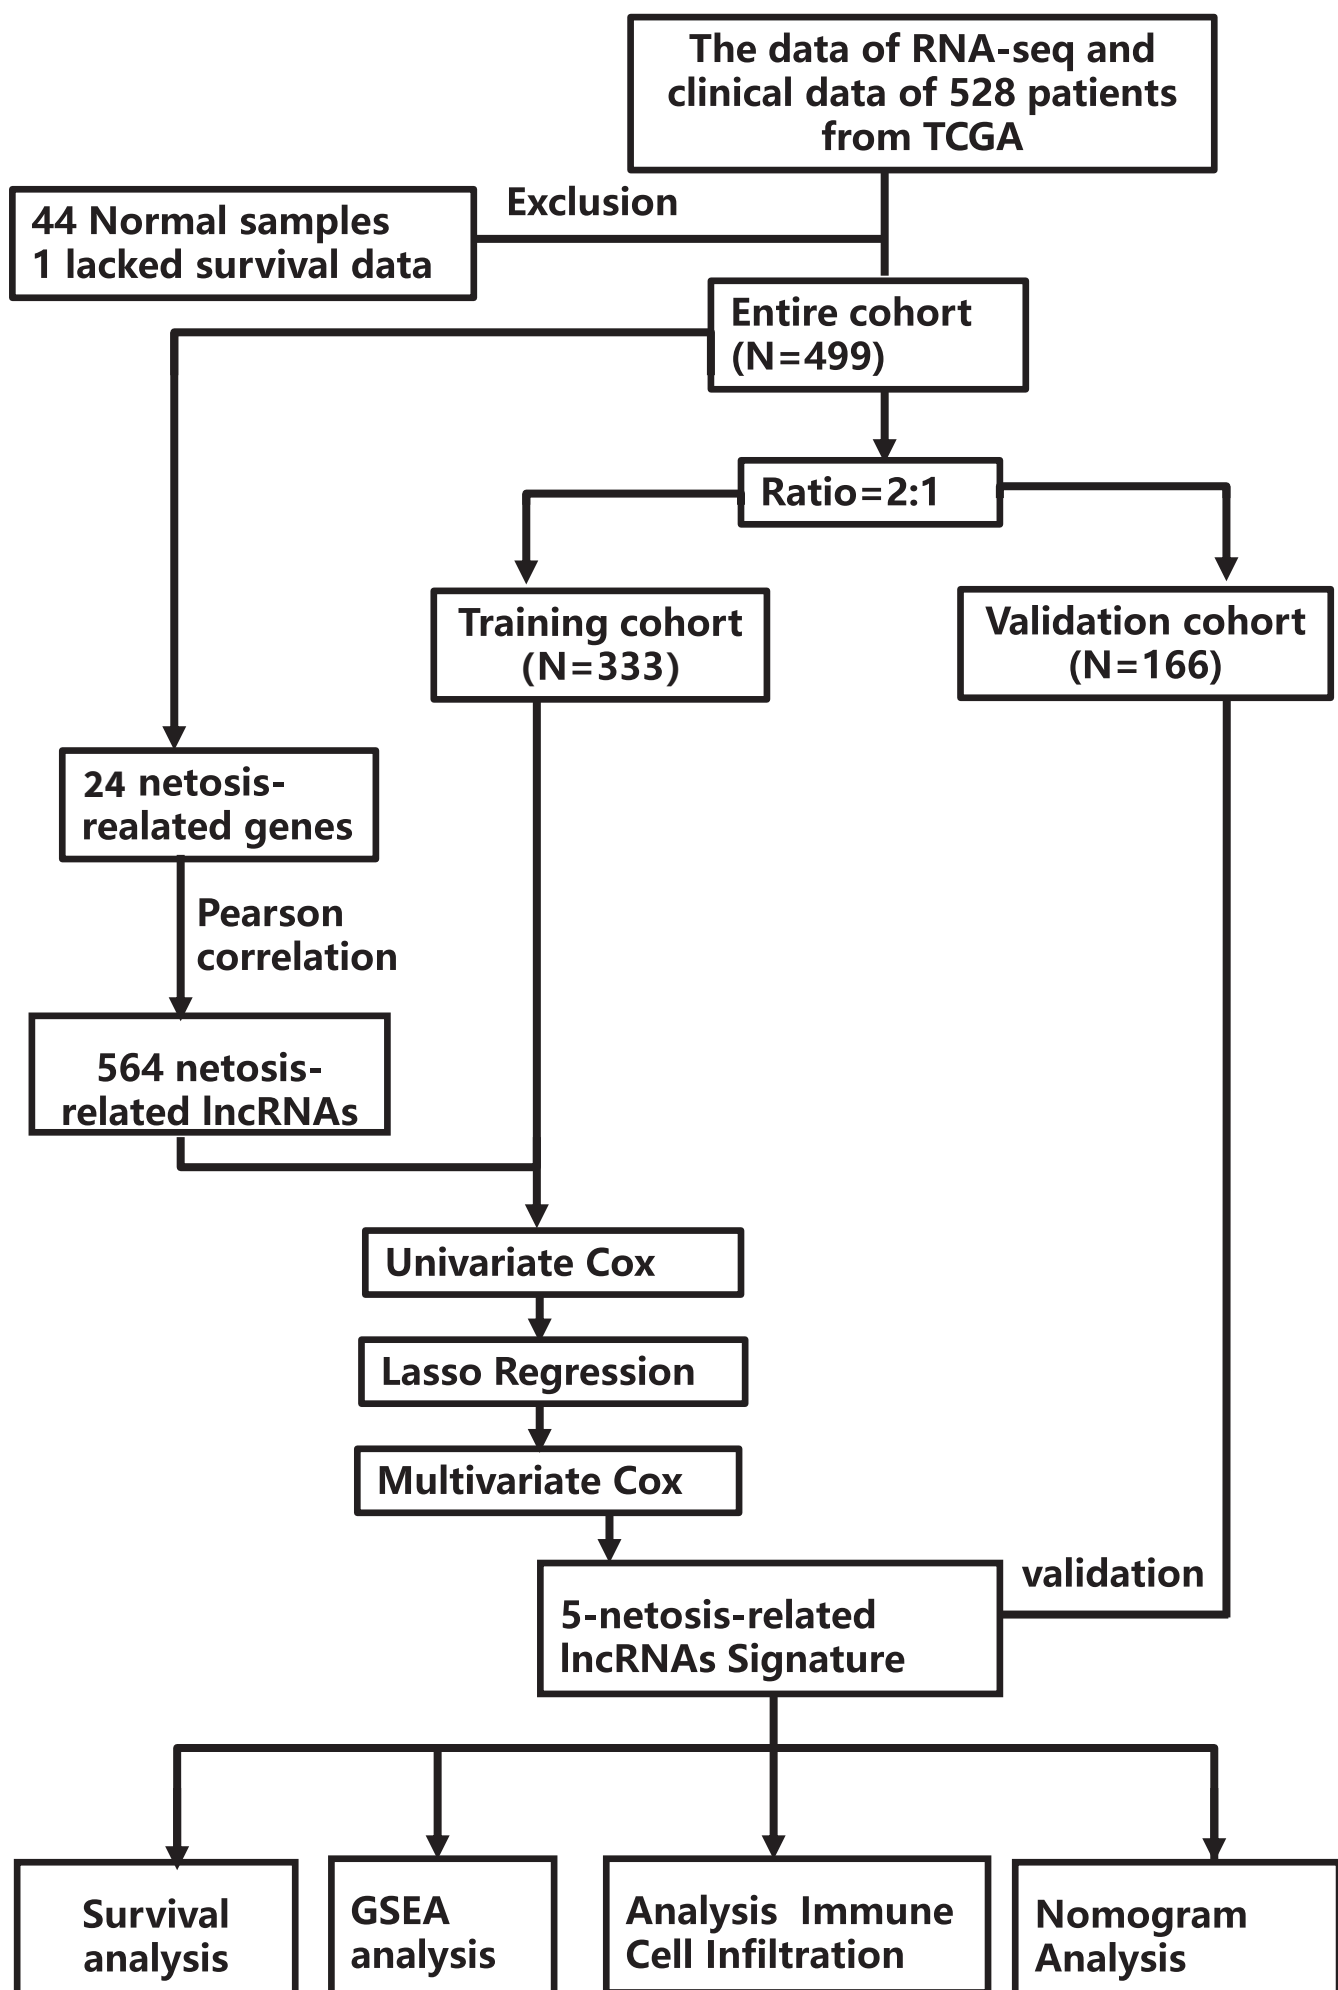

Supplement: f2 [file 3191474.f2.zip]

A

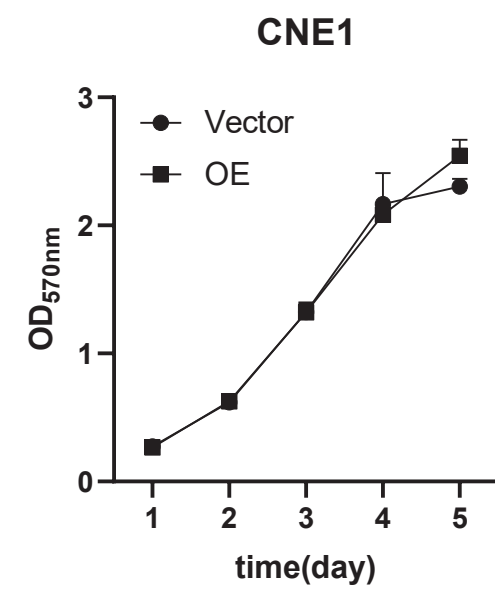

B

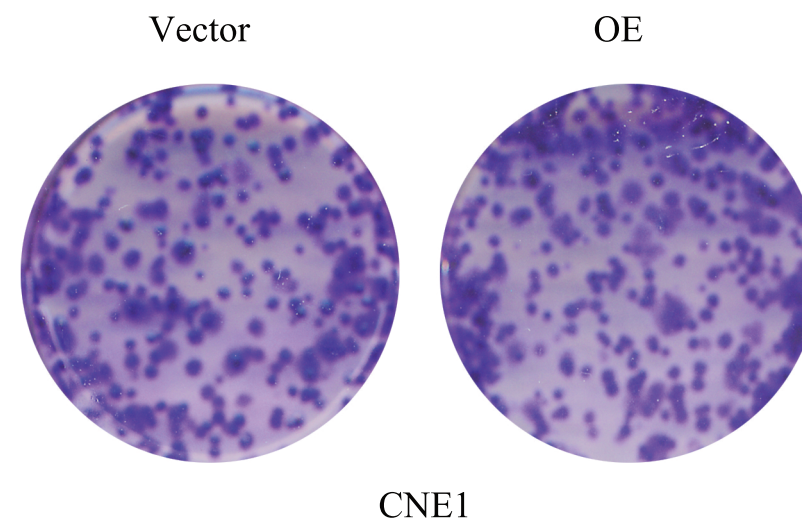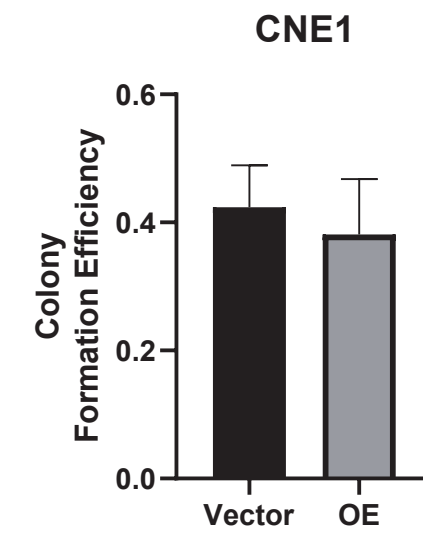

C

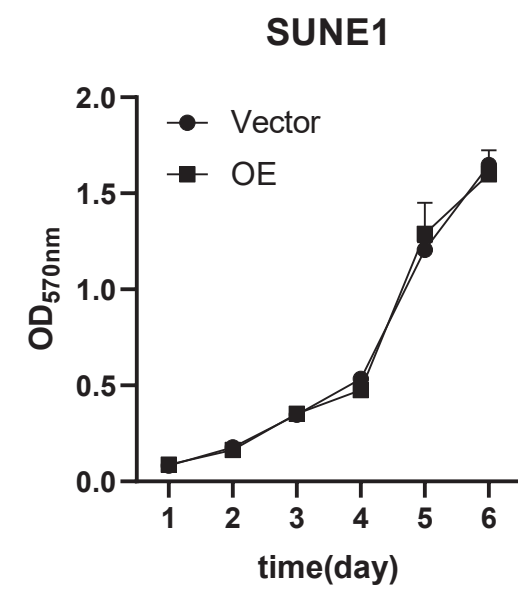

D

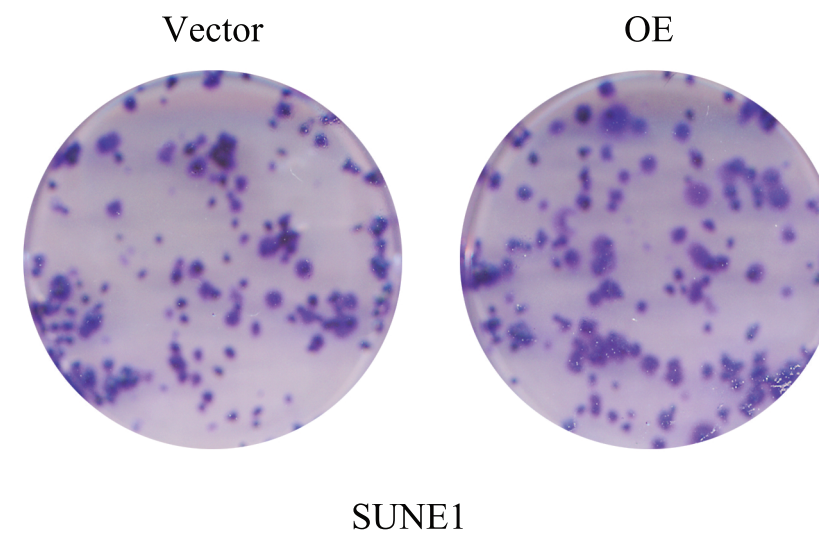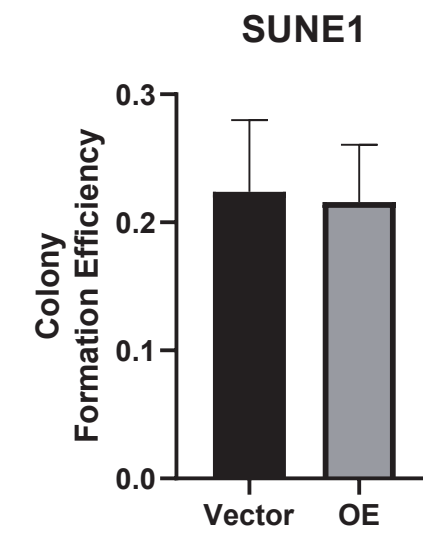

E

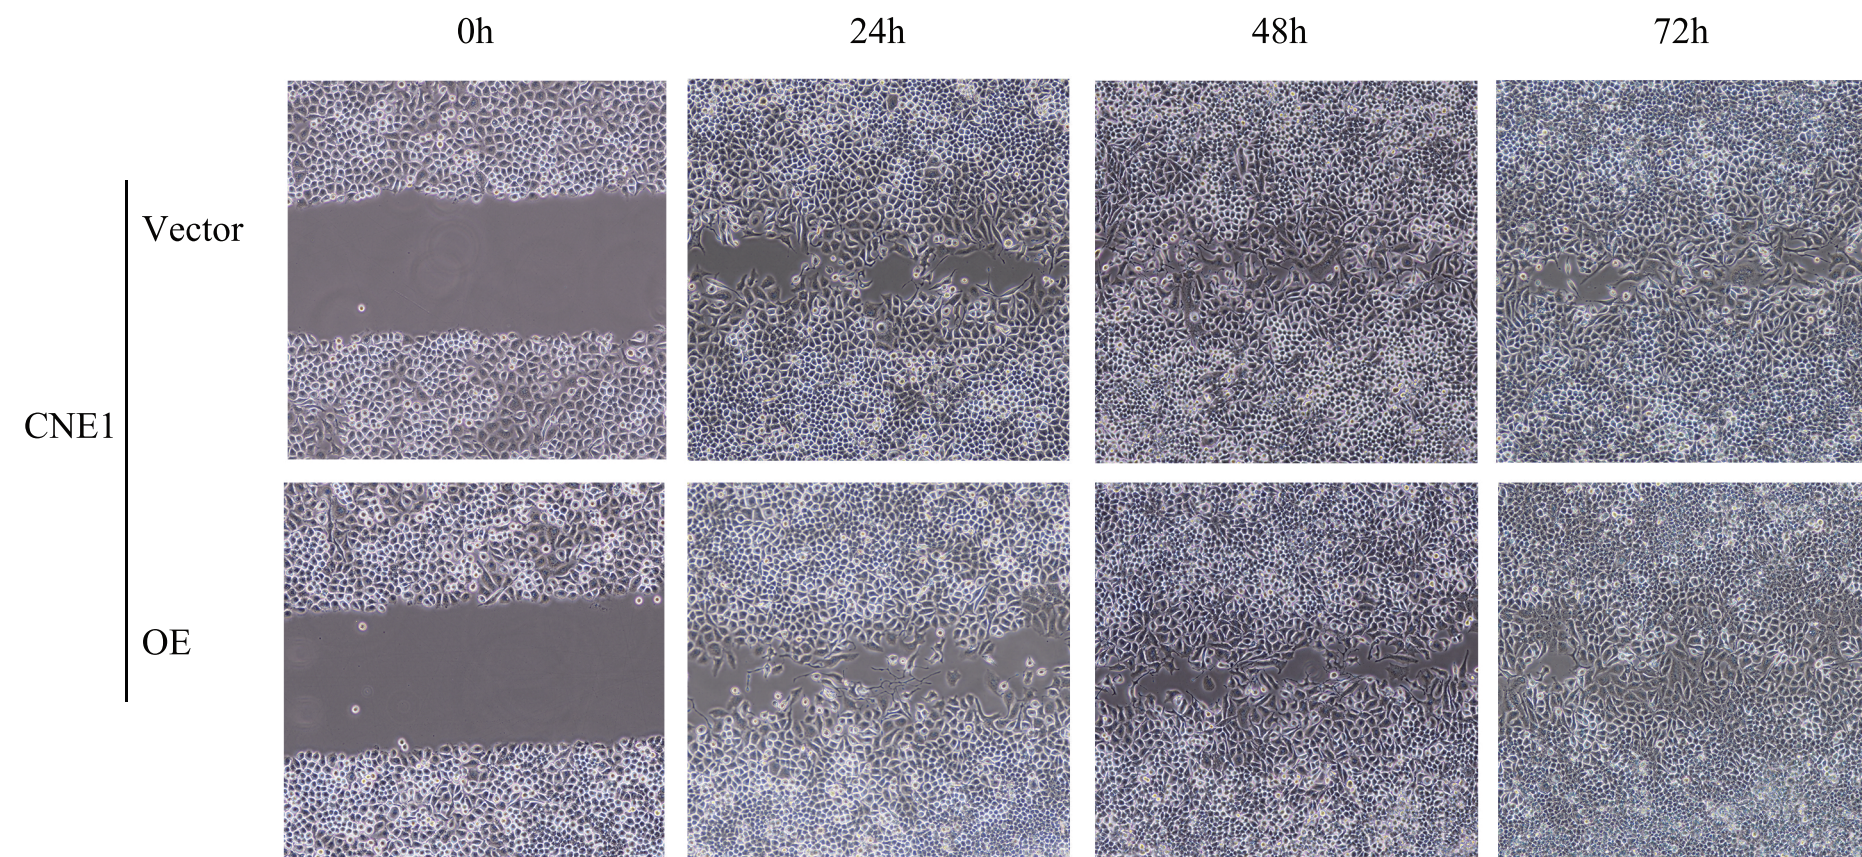

F

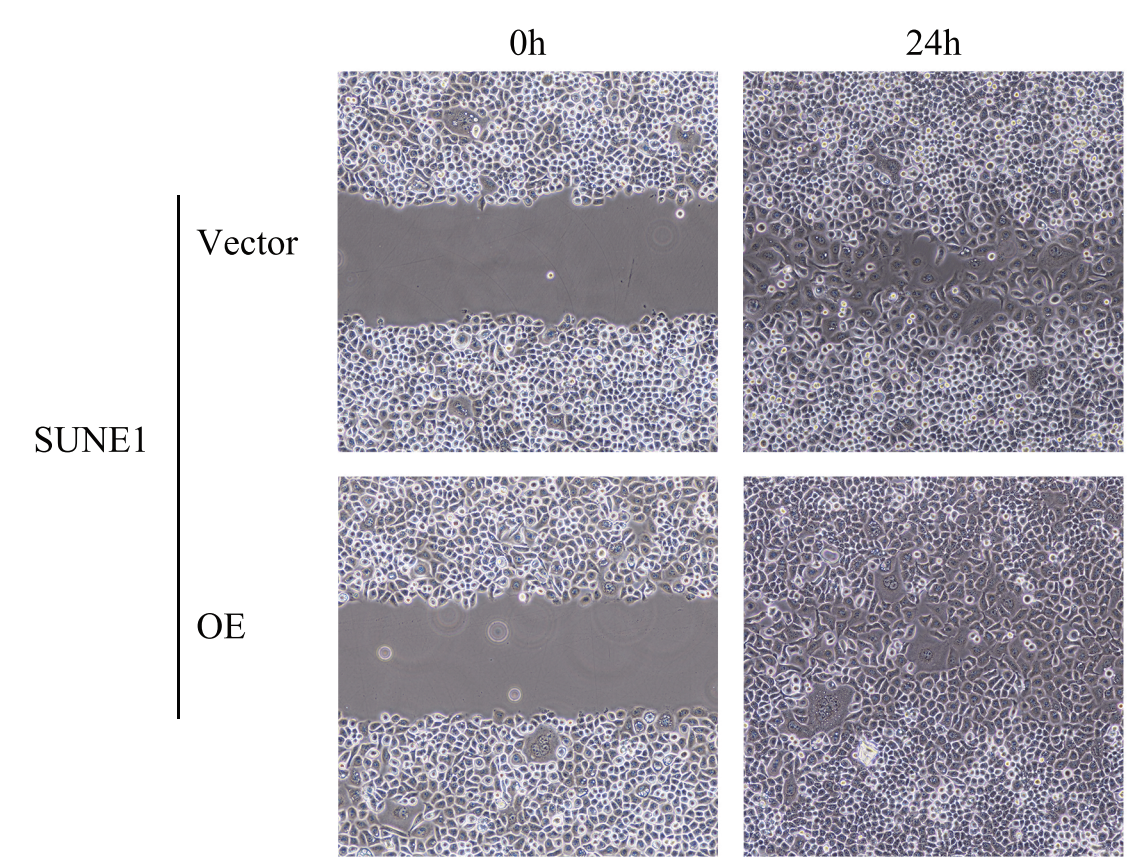

Supplement: f2 [file 3191474.f2.zip]
